# Supplementary material for: A sensitive miRNA detection method based on a split-T7 switch modulating CRISPR/Cas12a system
Source: Royal Society of Chemistry journal article supplement (doi:10.1039/d5cc00170f), 2025-01-01
Supplement: d5cc00170f1.pdf [file d5cc00170f1.pdf]

## Supporting Information

# **A sensitive miRNA detection method based on split-T7 switch modulating CRISPR/Cas12a system**

Dayong Li<sup>a</sup>, Wenting Cheng<sup>a</sup>, Feifan Yin<sup>a</sup>, Yanheng Yao<sup>a</sup>, Zhongyun Wang<sup>c,\*</sup>, Yang Xiang<sup>a,b,\*</sup>

<sup>a</sup> State Key Laboratory of Pharmaceutical Biotechnology, School of Life Sciences, Nanjing University, Nanjing 210023, P. R. China

<sup>b</sup> State Key Laboratory of Natural and Biomimetic Drugs, Peking University, Beijing 100191, P. R. China

<sup>c</sup> Department of Anesthesiology, The First Affiliated Hospital of Nanjing Medical University, Nanjing 210029, P. R. China

## Table of Contents

|                                                                               |     |
|-------------------------------------------------------------------------------|-----|
| 1. Materials and Methods.....                                                 | S3  |
| 2. Table of DNA and RNA<br>sequences.....                                     | S6  |
| 3. Validation of the feasibility of detecting miR-<br>21.....                 | S8  |
| 4. Optimization of experimental parameters.....                               | S10 |
| 5. Comparison of this method with other miRNA detection methods.....          | S11 |
| 6. Recovery test in ordinary reaction buffer, medium and 10% human serum..... | S12 |
| 7. RT-qPCR analysis in real samples.....                                      | S13 |
| 8. Reference.....                                                             | S14 |

## **Materials and Methods**

### **Reagents and Materials**

The DNA sequence is synthesized and purified by Sangon Biotechnology (Shanghai, China) Co., LTD. The RNA sequence was synthesized and purified by Genaray Biotechnology (Shanghai, China) Co., LTD. See Table S1 for details. EnGen Lba Cas12a (Cpf1) was purchased from New England Biolabs. T7 RNA polymerase, NTP purchased from Beyotime Biotechnology (Shanghai, China) Co., LTD. RNase inhibitor was purchased from Takara Bio (Dalian, China). Healthy human serum was obtained from the First Affiliated Hospital of Nanjing Medical University. This study was approved by the Ethics Committee of Nanjing University and Nanjing Medical University. Breast cancer cells (MCF-7) and human embryonic kidney cells (HEK293T) were purchased from the American Type Culture Collection (ATCC). DNA Marker, DEPC-H<sub>2</sub>O, TRE reagent, miRNA first strand cDNA synthesis kit (tailing reaction) kit, miRNA fluorescence quantitative PCR kit (SYBR Green Method) were purchased from Sangon Biotechnology (Shanghai, China) Co., LTD. Solution buffer: 10 mM Tris-HCl, 20 mM MgCl<sub>2</sub>, pH 7.4; 10× transcription buffer: 400 mM Tris-HCl, 20 mM Spermidine, 100 mM MgCl<sub>2</sub>, 10 mM DTT, pH 7.9; 10× NEBuffer r2.1 buffer: 50 mM NaCl, 10 mM Tris-HCl, 10 mM MgCl<sub>2</sub>, 100 µg/mL Recombinant Albumin, pH 7.9.

### **Polyacrylamide gel electrophoresis (PAGE) analysis**

We used 12 % PAGE to characterize the process of three-way junction self-assembly. Each sample was 10 µL in volume and consisted of 100 nM each for S1, S2, S3 and miRNA-21. The samples were placed in a metal bath and incubated at 37 °C for 20 min to fully hybridize the nucleic acids. At the end of the reaction, 2 µL of nucleic acid dye was added to each sample and then electrophoretic analysis was performed at 120 V for 50 min. In addition, we used 8 % PAGE for the characterization of transcription. 8 %

PAGE performed at 100 V for 40 min. The results of electrophoresis were analyzed in an imaging system.

### **Cell culture**

The breast cancer cell line (MCF-7) and human embryonic kidney cell line (HEK293T) used in this work were cultured in a high-sugar DMEM medium (Dulbecco's modified Eagle's medium). The medium was supplemented with 10 % (v/v) fetal bovine serum and 1 % (v/v) penicillin-streptomycin. All cells were cultured in a humidity-controlled incubator at 37 °C and 5 % CO<sub>2</sub>.

### **Specific steps for miRNA detection**

First, 1 μL sample, 3 μL probe (100 nM each for S1, S2 and S3), 1 μL NTP (10 mM), 2 μL 10× transcription buffer, 0.4 μL T7 RNA polymerase (50 U/μL), 1 μL RNase-inhibitor (40 U/μL) and 11.6 μL DEPC-H<sub>2</sub>O mixed with a total volume of 20 μL. Then the reaction was carried out at 37 °C for 30 min. After the reaction, it was inactivated at 70 °C for 5 min. Then, 2 μL 1 μM Cas12a protein, 2 μL 10 μM FQ fluorescence reporter molecule, 4 μL 500 nM activation DNA (NTS/TS), 5 μL 10× NEBuffer r2.1 buffer, and 17 μL DEPC-H<sub>2</sub>O were added to the reaction solution. The total volume is 50 μL. It was mixed and reacted at 37 °C for 20 min, then inactivated at 70 °C for 5 min. Finally, the reaction solution was transferred into a black 96-well plate, and the fluorescence intensity at 525 nm wavelength (excitation wavelength 485 nm) was measured using a microplate reader (TECAN Infinite 200Pro).

### **Extraction of total RNA from cell samples**

Total RNA was extracted from the cell samples using TRE reagent (Sangon Biology, Shanghai, China). The experimental operation was carried out according to the standard step in the instruction. The steps are as follows. Step 1, 500 μL of the sample is mixed with 1 mL of TRE reagent for cracking, followed by 600 μL of DEPC-H<sub>2</sub>O and left for 5 min at room temperature. After centrifugation at 12000 rpm for 15 min, transfer the upper water phase into a clean centrifuge tube. Step 2, add the same volume of isopropyl

alcohol, mix evenly, leave at room temperature for 20 min, centrifuge at 12000 rpm for 10 min, and remove the supernatant. Step 3, add 1 mL 75 % ethanol to clean and precipitate, centrifuge at 12000 rpm for 3 min, and remove the supernatant. Step 4, after drying at room temperature for 3-5 min, DEPC-H<sub>2</sub>O was added to dissolve the extracted total RNA, and then stored in an environment of -80 °C for subsequent use.

### **cDNA synthesis and qPCR analysis**

The synthesis of cDNA was performed using miRNA first strand cDNA synthesis kit (tailing reaction) (Sangon, Shanghai, China) in accordance with the operation steps of the product instructions. Then the obtained cDNA was analyzed by PCR. qPCR analysis was performed using the miRNA fluorescent quantitative PCR kit (SYBR Green Method) (Sangon, Shanghai, China). The experimental operation was performed according to the standard procedure in the instruction. We used U6 RNA as the internal reference gene for miRNA-21. qPCR reaction procedure: the pre-denaturation process was 95 °C, 30 seconds; The denaturation process is 95 °C, 5 seconds, then 60 °C, 30 seconds, a total of 40 cycles. Finally,  $2^{-\Delta\Delta Ct}$  was used to calculate the relative expression of miR-21 in the samples according to the experimental results.

**Table S1.** The DNA and RNA sequences used in this work.

| Name       | Sequence (5' to 3')                                                                            |
|------------|------------------------------------------------------------------------------------------------|
| Template-1 | ACCGA AATAA GATCA GAGAT ATC TAC ACT TAG TAG<br>AAA TTA CCCTATAGTGAGTCGTATTA<br>TTCCCAAACCCGC   |
| Template-2 | GCGGGTTTGGGAA TAATACGACTCACTATAGGG                                                             |
| S          | ACCGA AATAA GATCA GAGAT ATC TAC ACT TAG TAG<br>AAA TTA CCCTATAGTGAGTCGTATTA TT<br>CTGATAAGCTA  |
| S18        | ATACGACTCACTATAGGG                                                                             |
| S16        | ACGACTCACTATAGGG                                                                               |
| S14        | GACTCACTATAGGG                                                                                 |
| S12        | CTCACTATAGGG                                                                                   |
| S2         | TCAACATCAGT AA TA                                                                              |
| S4         | TCAACATCAGT AA TAAT                                                                            |
| S6         | TCAACATCAGT AA TAATAC                                                                          |
| S8         | TCAACATCAGT AA TAATACGA                                                                        |
| Target     | TAGCTTATCAG ACTGATGTTGA                                                                        |
| S1-4       | ACCGA AATAA GATCA GAGAT ATC TAC ACT TAG TAG<br>AAA TTA CCCTATAGTGAGTCGT ATTA CTGATAAGCTA       |
| S1-5       | ACCGA AATAA GATCA GAGAT ATC TAC ACT TAG TAG<br>AAA TTA CCCTATAGTGAGTCGT ATTA T<br>CTGATAAGCTA  |
| S1-6       | ACCGA AATAA GATCA GAGAT ATC TAC ACT TAG TAG<br>AAA TTA CCCTATAGTGAGTCGT ATTA TT<br>CTGATAAGCTA |
| S1-7       | ACCGA AATAA GATCA GAGAT ATC TAC ACT TAG TAG<br>AAATTA CCCTATAGTGAGTCGT ATTA TTT<br>CTGATAAGCTA |

|                               |                                                                                               |
|-------------------------------|-----------------------------------------------------------------------------------------------|
| S3-4                          | TCAACATCAGT TAAT                                                                              |
| S3-5                          | TCAACATCAGT A TAAT                                                                            |
| S3-6                          | TCAACATCAGT AA TAAT                                                                           |
| S3-7                          | TCAACATCAGT AAA TAAT                                                                          |
| miR-21                        | UAGCUUAUCAG ACUGAUGUUGA                                                                       |
| 1M                            | UAGCUUAUAAG ACUGAUGUUGA                                                                       |
| 2M                            | UAGCUUAUAAG GCUGAUGUUGA                                                                       |
| let-7a                        | UGAGGUAGUAG GUUGUAUAGUU                                                                       |
| miR-17                        | CAAAGUGCUUACAGUGCAGGUAG                                                                       |
| S1-let-7a                     | ACCGA AATAA GATCA GAGAT ATC TAC ACT TAG TAG<br>AAA TTA CCCTATAGTGAGTCGT ATTA T<br>CTACTACCTCA |
| S3-let-7a                     | AACTATAACAAC A TAAT                                                                           |
| CrRNA                         | UAA UUU CUA CUA AGU GUA GAU AUCUC UGAUC<br>UUAUU UCGGU                                        |
| Activation<br>DNA-TS          | ACCGA AATAA GATCA GAGAT GAAACT                                                                |
| Activation<br>DNA-NTS         | AGTTTC ATCTC TGATC TTATT TCGGT                                                                |
| Fluorescence<br>reporter (FQ) | FAM-TTATTT-BHQ1                                                                               |
| miR-21-5p<br>forward primer   | TAGCTTATCAGACTGATGTTGA                                                                        |
| miR-21-5p<br>reverse primer   | TGCGTGTCGTGGAGT                                                                               |
| U6<br>forward primer          | GCTTCGGCAGCACATATACTAAAAT                                                                     |
| U6<br>Reverse primer          | CGCTTCACGAATTTGCGTGTCAT                                                                       |

Note: The pink sequences represent the transcription template; the purple sequences represent the T7 promoter sequence; the blue sequences represent mutation site.

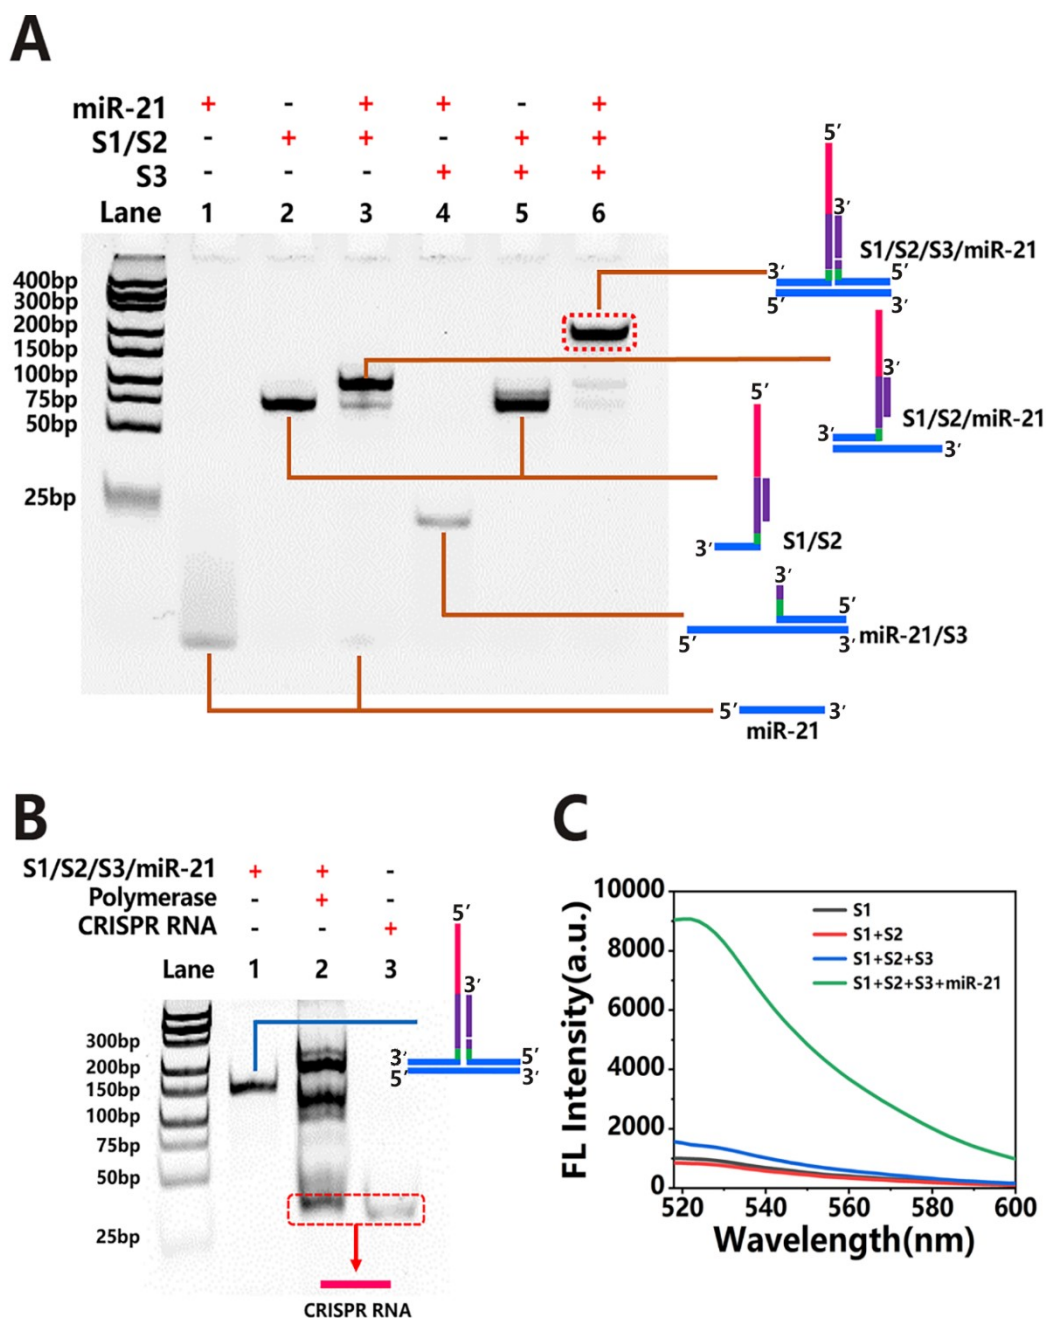

**Fig. S1.** (A) 12% PAGE analysis was used to verify the three-way junction self-assembly of miR-21 and the detection probe. Lane 1: target miR-21; Lane 2: S1 + S2; Lane 3: miR-21 + S1 + S2; Lane 4: miR-21 + S3; Lane 5: S1 + S2 + S3; Lane 6: miR-21 + S1 + S2 + S3. The concentration of S1, S2, S3 and miR-21 is 100 nM. The reaction was performed at 37 °C for 20 min. The electrophoretic analysis was performed at 120 V for 50 min. (B) Electrophoresis analysis of transcripts of the three-way junction



template by 8% PAGE. Lane 1: S1 + S2 + S3 + miR-21; Lane 2: S1 + S2 + S3 + miR-21 + T7 RNA polymerase; Lane 3: Synthetic CRISPR RNA. The concentration of S1, S2, S3 and miR-21 is 100 nM. The concentration of synthetic CRISPR RNA is 50 nM. The transcriptional reaction was performed at 37 °C for 30 min, then inactivated at 70 °C for 5 min. The electrophoretic analysis was performed at 100 V for 40 min. (C) The corresponding fluorescence spectra of the method under different reaction components. The concentration of S1, S2, S3 is 20 nM. The concentration of miR-21 is 100 pM. The transcriptional reaction is performed at 37 °C for 20 min, then 70 °C for 5 min. CRISPR reaction time is 10 min. The fluorescence emission wavelength is 525 nm, excitation wavelength is 485 nm.

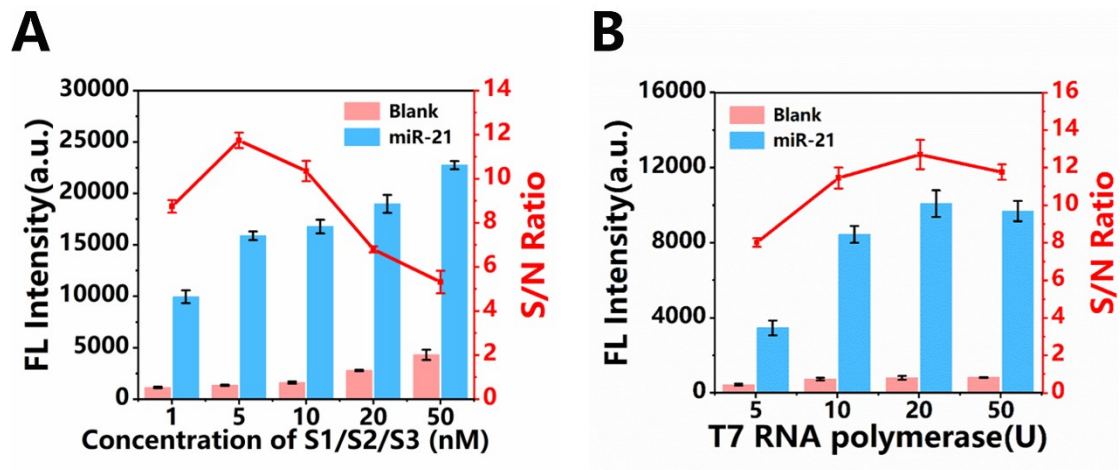

**Fig. S2.** (A) Optimization of the concentration of the detection probe (S1/S2/S3). The concentration of miR-21 is 100 pM. Transcription is performed at 37 °C for 20 min, CRISPR reaction time is 15 min. (B) Optimization of concentration of T7 RNA polymerase used in the transcription. The concentration of S1, S2, S3 is 50 nM, and miR-21 is 100 pM. Error bars: standard deviation (SD), n = 3.

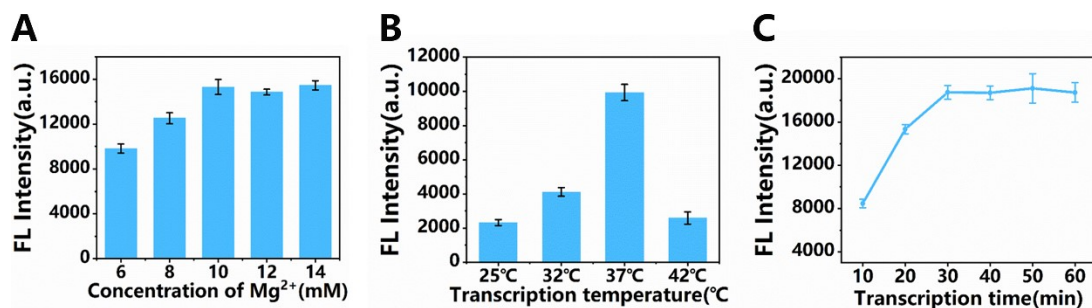

**Fig. S3.** (A) Optimization of magnesium ion (Mg<sup>2+</sup>) concentration in transcription reaction (range from 6 mM to 14 mM). (B) Optimization of transcription temperature. (C) Optimization of transcription time. The concentration of S1, S2, S3 is 50 nM, and the concentration of miR-21 is 100 pM. Error bars: standard deviation (SD), n = 3.

**Table S2.** Comparison of this method with other miRNA detection methods.

| <b>Method</b>    | <b>LOD</b> | <b>Linear range</b> | <b>Time</b> | <b>References</b> |
|------------------|------------|---------------------|-------------|-------------------|
| Colorimetry      | 2.4 pM     | 10 pM-100 nM        | 165 min     | [1]               |
| Electrochemistry | 79.8 fM    | 0.1 pM-10 nM        | 125 min     | [2]               |
| Distance         | 6.28 pM    | 10 pM-10 nM         | 130 min     | [3]               |
| Fluorescence     | 161 fM     | 500 fM-500 pM       | 160 min     | [4]               |
| Fluorescence     | 43.9 fM    | 100 fM-1 nM         | 60 min      | This work         |

**Table S3.** Recovery tests of the method in ordinary reaction buffer, medium and 10 % human serum.

| <b>Sample number</b> | <b>Samples</b> | <b>Added(pM)</b> | <b>Found(pM)</b> | <b>Recovery (%)</b> | <b>RSD (%)</b> |
|----------------------|----------------|------------------|------------------|---------------------|----------------|
| 1                    | Buffer         | 10               | 9.94             | 99.4                | 3.8            |
| 2                    | Culture medium | 10               | 10.6             | 106                 | 4              |
| 3                    | 10% Serum      | 10               | 9.38             | 93.8                | 3.9            |
| 4                    | Buffer         | 100              | 105              | 105                 | 2.9            |
| 5                    | Culture medium | 100              | 104.1            | 104.1               | 3.2            |
| 6                    | 10% Serum      | 100              | 96.01            | 96.01               | 9.8            |

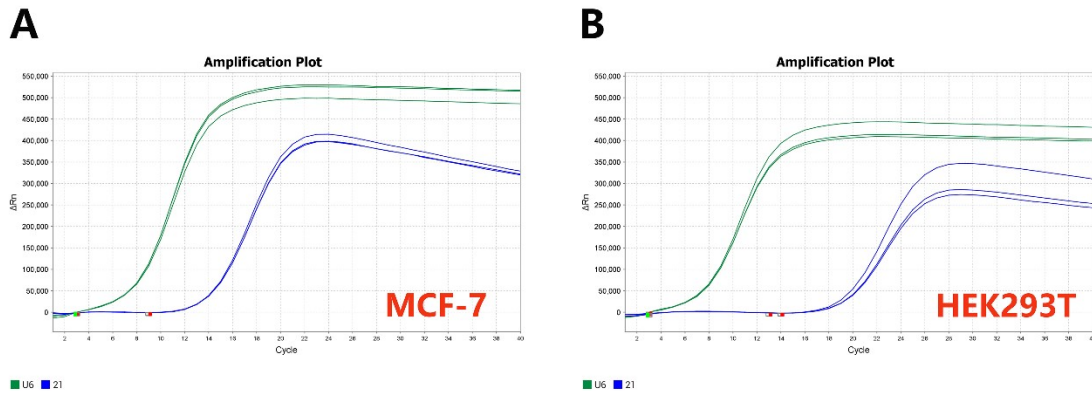

**Fig. S4.** RT-qPCR curves for the detection of miR-21 and U6 RNA from total RNA extracted from two cell samples. The concentration of total RNA is 2  $\mu\text{g}$  for each sample. Blue: miR-21; Green: U6. U6 is used as the reference gene of miR-21. The average Ct value of miR-21 in breast cancer cell line (MCF-7) was 13.931. The average Ct value of U6 was 7.02. The average Ct value of miR-21 in human embryonic kidney cell line (HEK293T) was 19.529. The average Ct value of U6 was 7.09. The results showed that MCF-7 overexpressed miR-21 compared with HEK293T when U6 RNA expression levels were similar in the above cell lines.

## Reference

1. S. H. Gong, J. J. Li, W. Pan, N. Li and B. Tang, *Anal. Chem.*, 2021, **93**, 10719-10726.
2. S. Han, W. Y. Li, S. Yang and R. S. Wang, *ACS Omega*, 2019, **4**, 11025-11031.
3. S. Feng, H. Chen, Z. Hu, T. Wu and Z. Liu, *ACS Appl. Mater. Interfaces*, 2023, **15**, 28933-28940.
4. Z. Lu, W. Ni, N. Liu, D. Jin, T. X. Li, K. Li, Y. L. Zhang, Q. F. Yao and G. J. Zhang, *Microchem. J.*, 2023, **187**, 108370.
